# Supplementary material for: Site-Specific Phosphorylation of Histone H1.4 Is Associated with Transcription Activation
Source: PubMed Central journal article supplement (PMC7700352; doi:10.3390/ijms21228861), 2020-11-23
Supplement: ijms-21-08861-s001.pdf [file ijms-21-08861-s001.pdf]

## Supplementary Figures

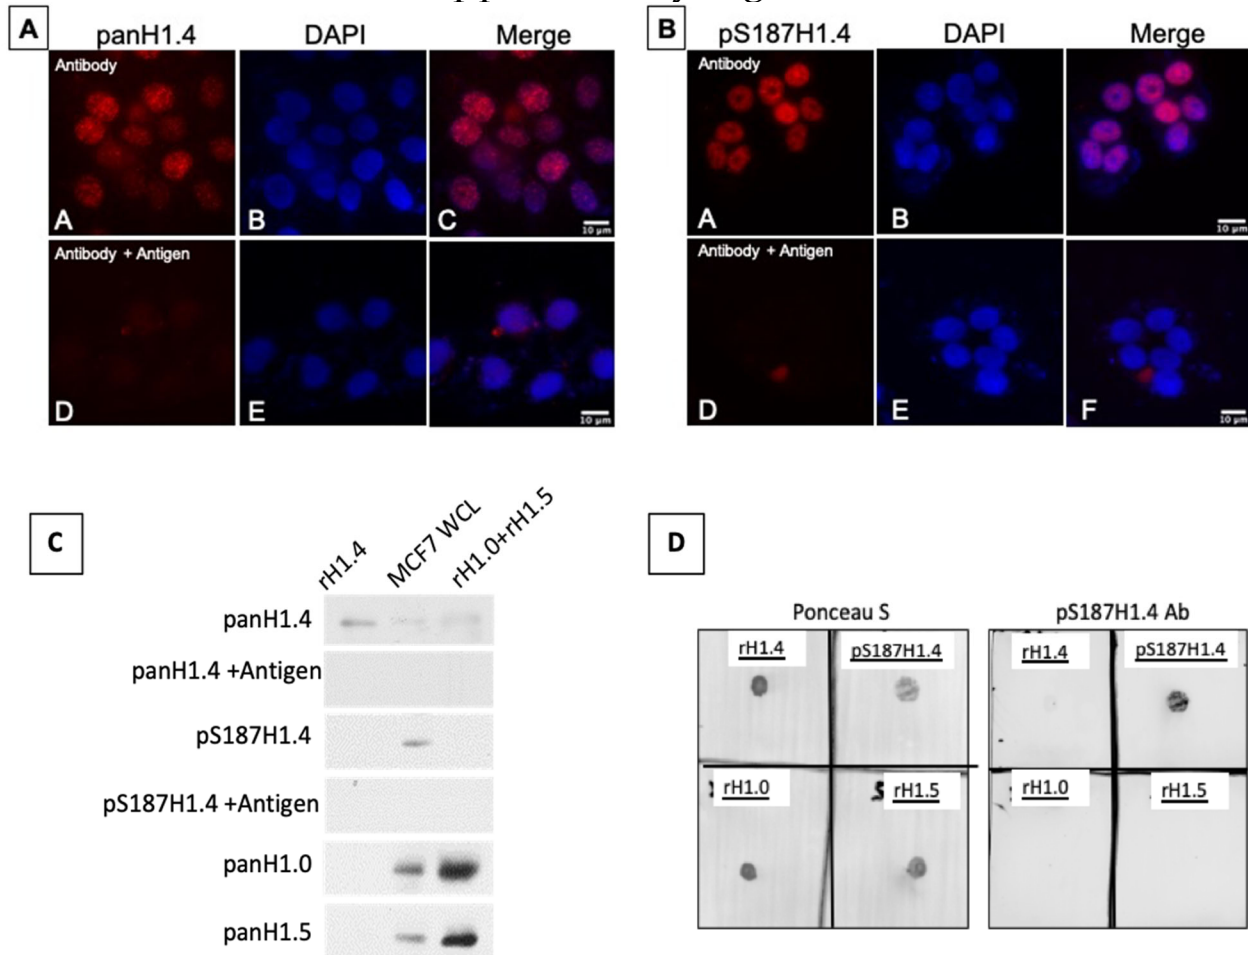

**Supplementary Figure 1.** Antibody validation for pS187-H1.4 and pan-H1.4 affinity purified antisera. (A) Immunofluorescence performed on MCF7 cells to show pan-H1.4 staining (panels A–C). The pan-H1.4 signal was quenched when the immunofluorescence was performed with antigen-adsorbed pan H1.4 antibody (Panels D–F). (B) Immunofluorescent staining performed on MCF7 cells to show pS187-H1.4 staining (panels A–C). The pS187-H1.4 signal was quenched when the immunofluorescence was performed with antigen-adsorbed pS187-H1.4 antibody (Panels D–F). Scale bar of 10 $\mu$ m in DAPI merge panels representative of the preceding images. (C) Western blot performed with recombinant H1.4, MCF7 whole cell lysate (WCL) and a mixture of recombinant H1.0 and H1.5. pan-H1.4 and pS187-H1.4 antibodies used to show specific signal and demonstrate quenching when antibody was antigen adsorbed. (D) Dotblot performed to demonstrate specificity of pS187-H1.4 antibody. Left panel show ponceau staining of the recombinant H1.4, H1.0, H1.5 and pS187H1.4 peptide. The right panel shows specific staining with pS187-H1.4 antibody.

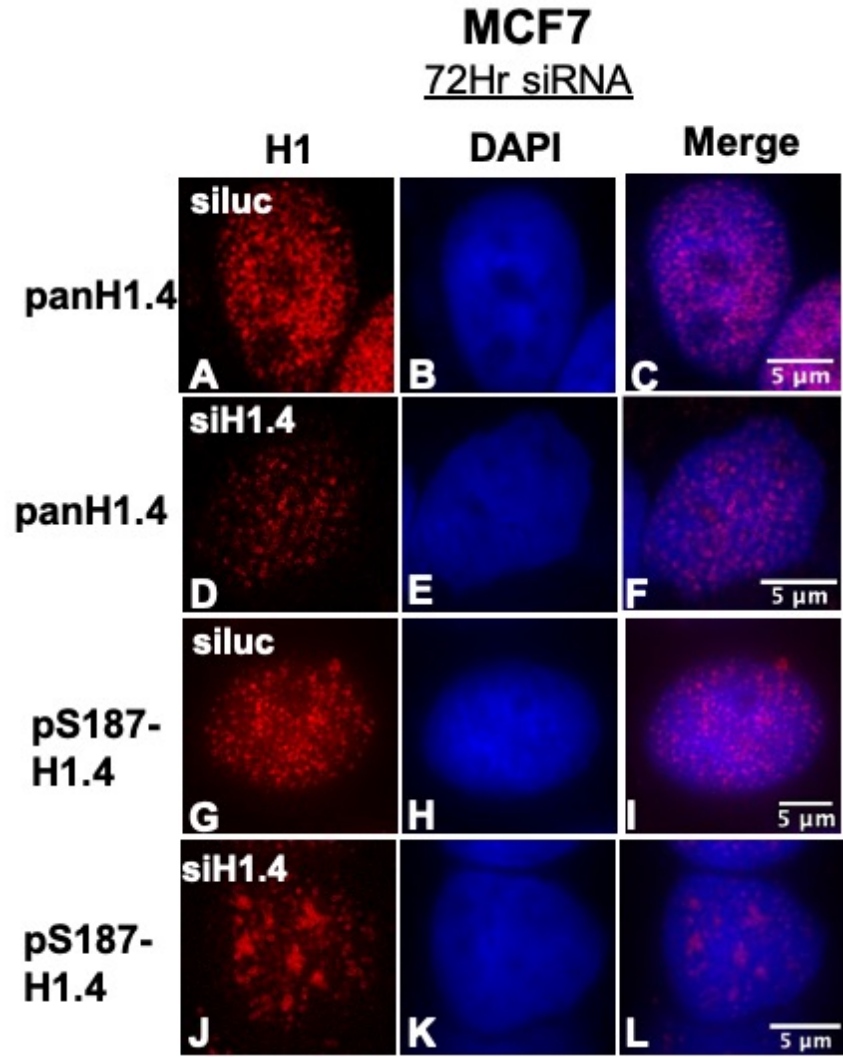

**Supplementary Figure 2:** Immunofluorescence of MCF7 cells (nuclei) treated with siLuc/siH1.4. Panels (A–F) shows pan-H1.4 staining of nuclei treated with siluc (A–C) and siH1.4 (D–F). Panels G–L shows pS187-H1.4 staining of nuclei treated with siluc (G–I) and siH1.4 (J–L). Scale bar of 5μm in DAPI merge panels representative of the preceding images

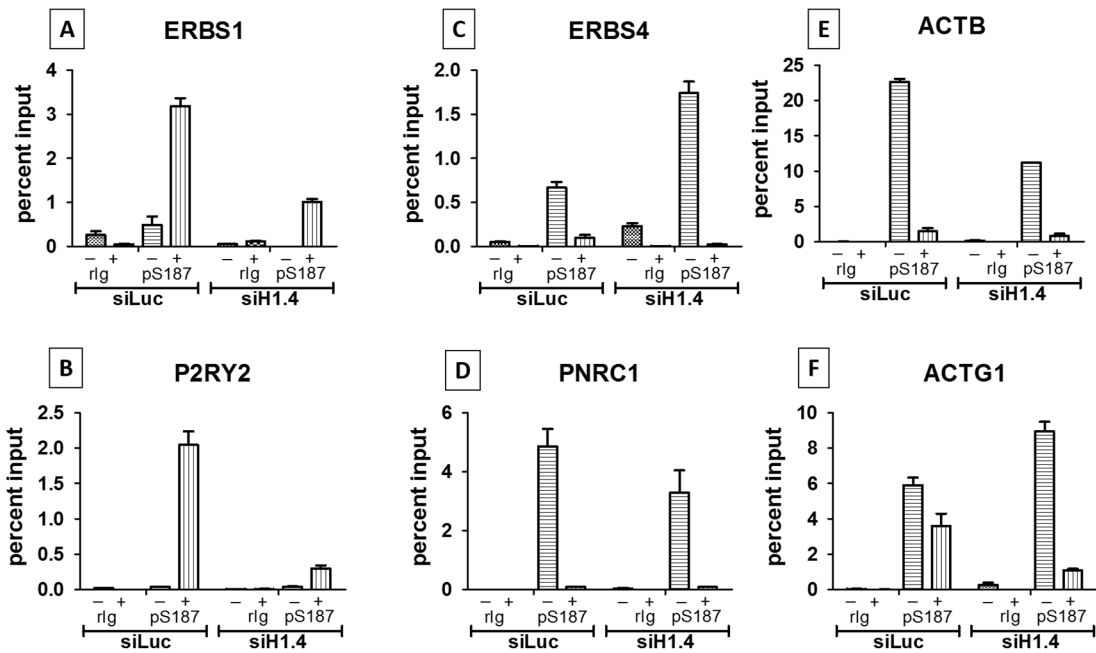

**Supplementary Figure 3.** Changes in the levels of pS187-H1.4 at promoters of genes responsive to estradiol (E2) (A–D) and housekeeping genes (E–F) as a result of siRNA treatment against H1.4 were assessed by ChIP-qPCR. (A–B). The levels of pS187-H1.4 at the promoters of P2RY2 and ERBS1 rise as a result of estradiol treatment. These levels drop as a result of H1.4 knockdown. (C–D) The levels of pS187-H1.4 at the promoters of PNRC1 and ERBS4 are repressed as a result of estradiol treatment. These levels diminish further as a result of siRNA mediated H1.4 knockdown. E–F) ACTB and ACTG1 appear to be repressed as a result of estradiol treatment. However, the pS187-H1.4 levels at the promoter of ACTB result in a further decrease of signal. pS187-H1.4 appears to increase as a result of the H1.4 knockdown but is reduced more than the siluc control when induced with estradiol. In all cases, negative control ChIP assays were employed non-immune rabbit immunoglobulin (rIg) in place of primary antisera.

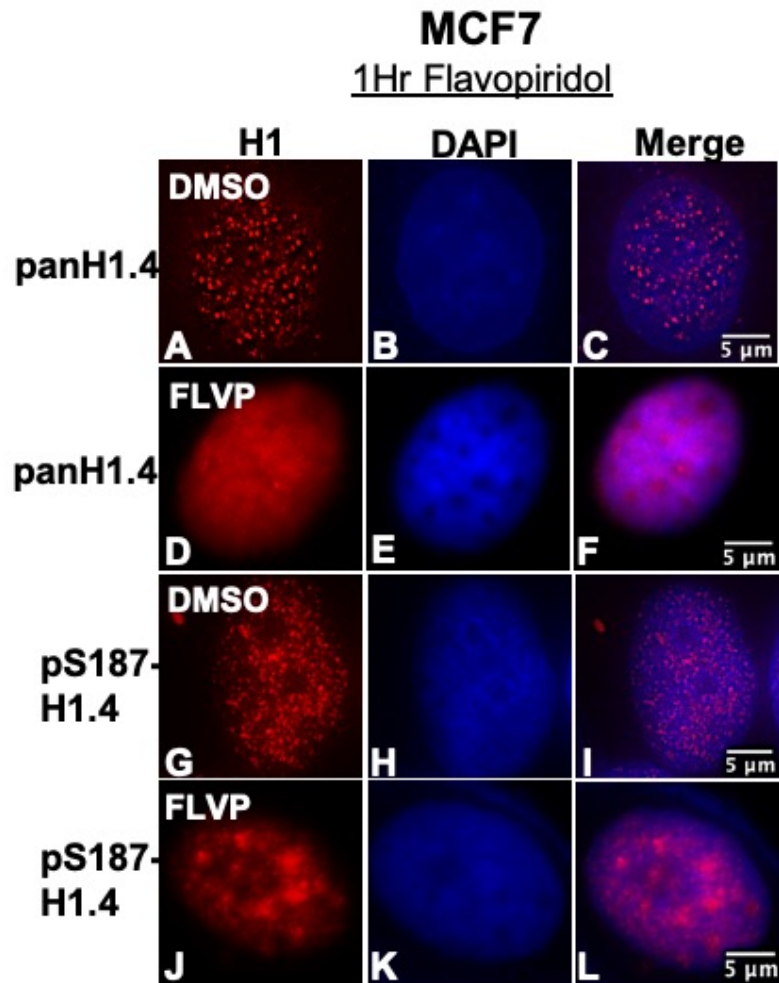

**Supplementary Figure 4:** Immunofluorescence of MCF7 cells (nuclei) treated with DMSO/FLVP for 1 Hour. Panels A–F shows pan-H1.4 staining of nuclei treated with DMSO (A–C) and FLVP (D–F). Panels G–L shows pS187-H1.4 staining of nuclei treated with DMSO (G–I) and FLVP (J–L).

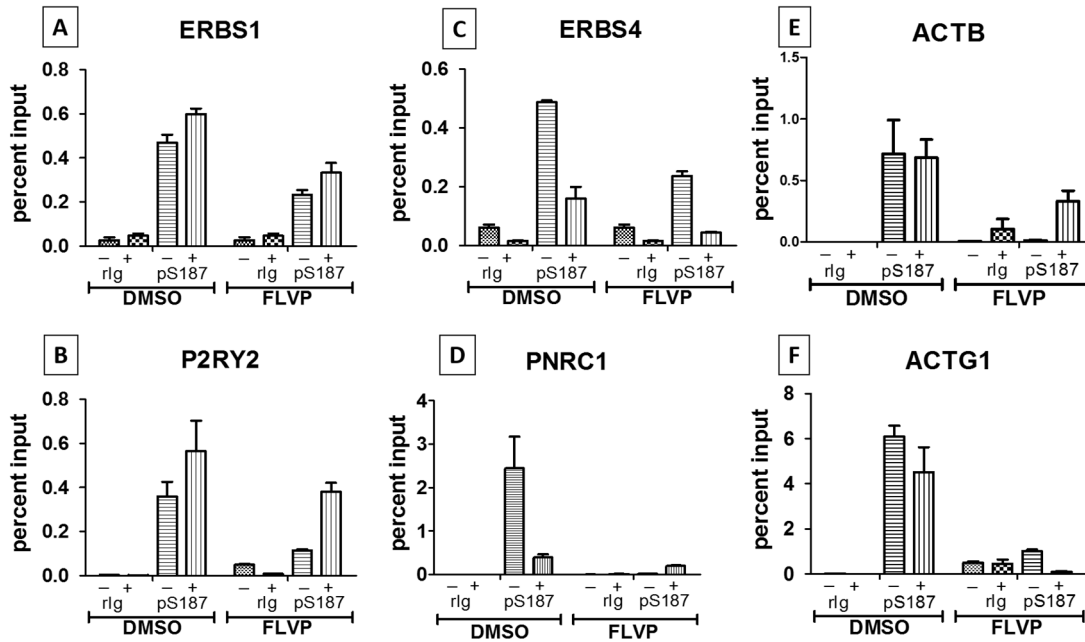

**Supplementary Figure 5:** Changes in the levels of pS187-H1.4 at promoters of genes responsive to estradiol (E2) (A–D) and housekeeping genes (E–F) as a result of FLVP treatment against H1.4 were assessed by ChIP-qPCR. (A–B) The levels of pS187-H1.4 at the promoters of P2RY2 and ERBS1 rise as a result of estradiol treatment. These levels drop as a result of H1.4 knockdown. C–D) The levels of pS187-H1.4 at the promoters of PNRC1 and ERBS4 are repressed as a result of estradiol treatment. These levels diminish further as a result of FLVP. E–F) ACTB and ACTG1 appear to be repressed as a result of estradiol treatment. However, the pS187-H1.4 levels at the promoter of ACTB result in a further decrease of signal. pS187-H1.4 appears to increase as a result of the H1.4 knockdown but is reduced more than the siluc control when induced with estradiol. In all cases, negative control ChIP assays were employed non-immune rabbit immunoglobulin (rIg) in place of primary antisera.

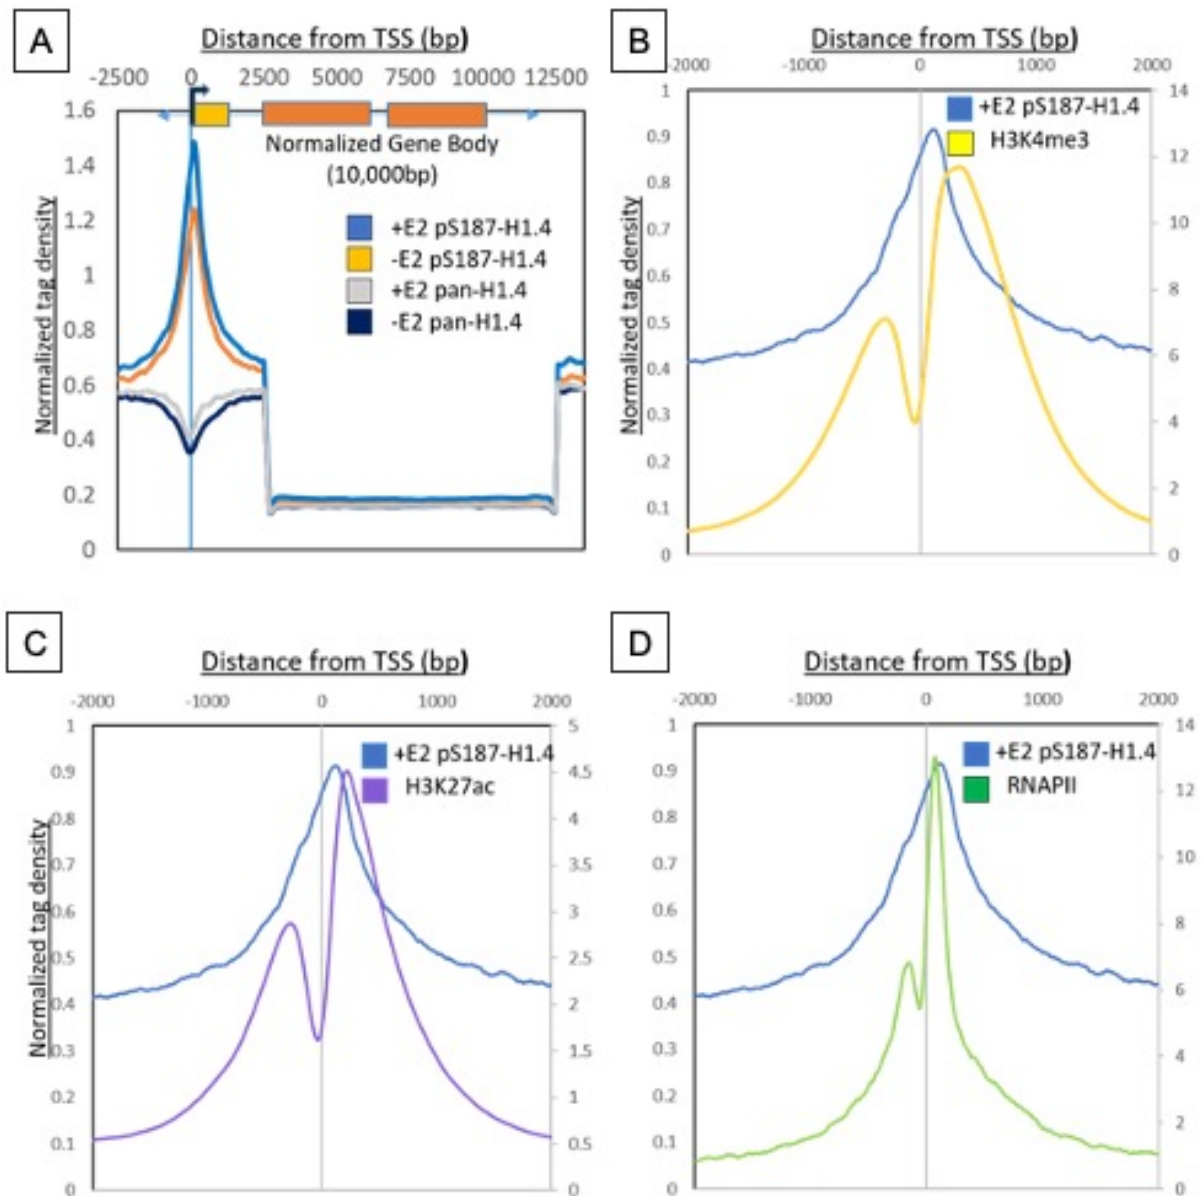

**Supplementary Figure 6:** Metagenome and aggregate plots demonstrating E2 induced pS187-H1.4 signal correlating with TSS and active transcription marks. (A) A metagenome profile generated with E2 induced pS187-H1.4 and pan-H1.4 ChIP-sequencing data to study enrichment across a typical gene. The gene body was mathematically defined and normalized to 10kb. +2.5kb and -2.5kb regions relative to the promoter were binned at 100bp. 2.5kb to 10kb represents a normalized gene body binned at 200bp. Typical transcription start sites (TSSs) showed maximum enrichment of the E2 induced pS187-H1.4 signal (blue trace). (B): Aggregate plot centered on the promoter showing average E2 induced pS187-H1.4 signals and its overlap with H3K4me3 signals. The signal was aligned +2Kb and -2Kb relative to the Refseq TSSs H3K4me3 was plotted on a secondary axis (label on right side). Overlap ratio: 3.25 (C): Aggregate plot centered on the promoter showing average pS187-H1.4 signals and its overlap with H3K27ac signals. H3K27ac was plotted on a secondary axis (label on right side). Overlap ratio: 4.99. (D) Aggregate plot centered on the promoter showing average pS187-H1.4 signals and its overlap with RNAPII signals. Overlap ratio: 3.14

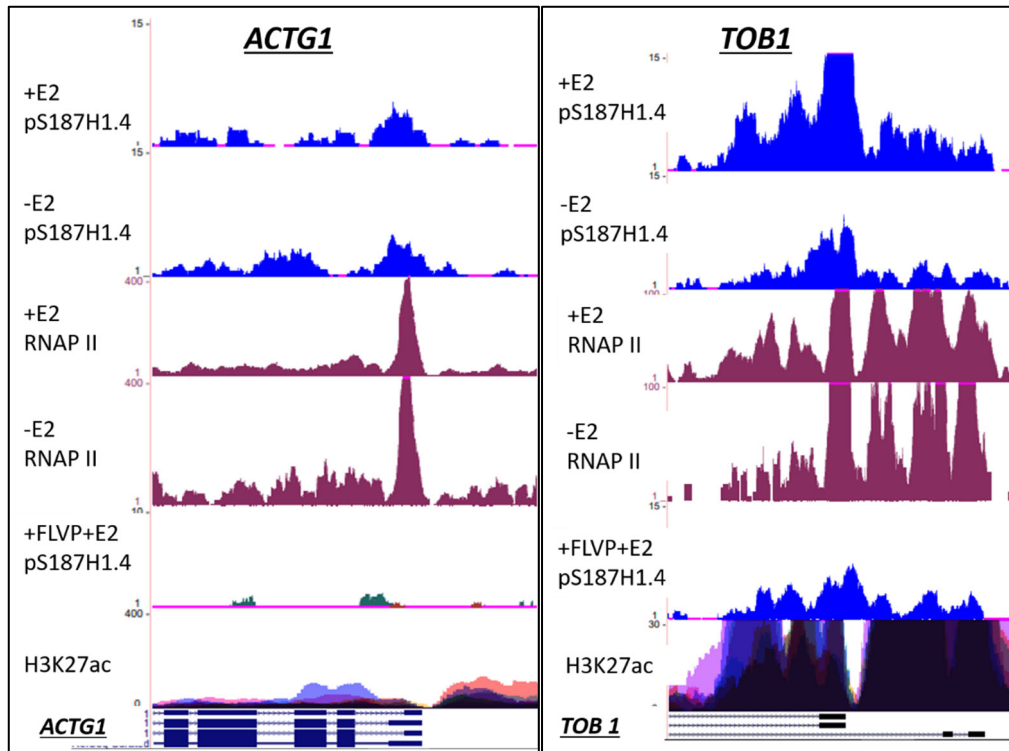

**Supplementary Figure 7:** UCSC genome browser shots of pS187-H1.4 signal (blue) before and after ( $\pm$ ) estradiol treatment at mildly responsive housekeeping gene *ACTG1* and fully responsive *TOB1* genes and their co-localization with the RNAPII signals (magenta).

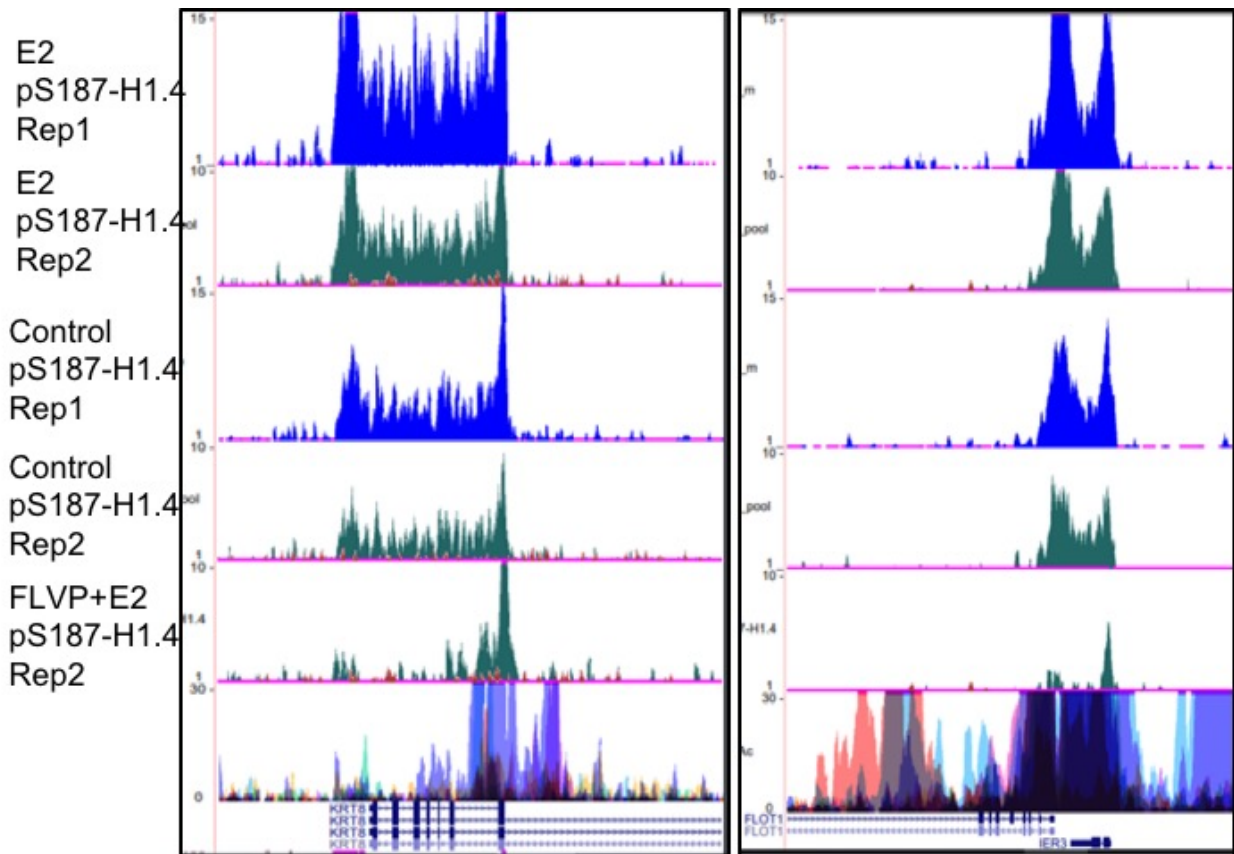

**Supplementary Figure 8:** Representative browser shots of two biological repeats of pS187-H1.4 signals before and after E2 treatment as well as pre-treatment with FLVP followed by E2, at individual genes. Repeat 1 is shown in blue and repeat 2 is shown in green. Trends observed are close to identical with an agreement value > 0.94.



**Supplementary Table 1:** Primers used for ChIP-qPCR.

| <b>Gene Name</b> | <b>Forward Primer</b>   | <b>Reverse Primer</b>   |
|------------------|-------------------------|-------------------------|
| TFF1             | GAACAAGGTGATCTGCGCC     | CACTGTACACGTCTCTGTCTGG  |
| FLOT1            | AAGCTGCCCCAGGTGGCAGAG G | TGTTCTCAAAGGCTGTGATCACC |
| TOB1             | GCTGTGTGGAGAAGTGAGCG    | CTTGGGAGATCGCCGTTAGT    |
| SMAD7            | TGGGTCCAAGGACAGATGTA    | ACTCTCTGCATTGGTGAAGC    |
| SOX2             | GGGAAAGTAGTTTGCTGCC     | GCTTAAGCCTGGGGCTC       |
| POU5F1           | CTTCGCAAGCCCTCATT       | AGGTCCGAGGATCAACCC      |
| ACTG1            | CGGCTTTCGGAAAGATCG      | GAGCGGCGGAAGAACAGA      |
| ACTB             | GAAAGTTGCCTTTTATGGCTCG  | TTACCTGGCGGCGGGTGT      |
| P2RY2            | CGGTGGACTTAGCTCTGAGG    | GCCTCCAGATGGGTCTATGA    |
| PNRC1            | TCGCTCAGCAACGAAGAGAG    | TCGCTCAGCAACGAAGAGAG    |
| ERBS1            | AGGCAAATCCATTGTCATCC    | AACTGGCTGGATCTTGAAGC    |
| ERBS4            | GGCATAGCTAGGACCTCACC    | GAGGGAGGAAAGTGGCTTCT    |
